# Supplementary material
Source: publisher figshare collection journal article supplement (https://gsajournals.figshare.com/ndownloader/files/13192307)
Supplement: Supplementary file 1 [file 13192307]

## Sheet: information
SUPPA significant exon skipping events (p-value < 0.01 and absolute dPSI >= 0.1)
	Total	PSI up	PSI down
sac3a	26	17	9
prp4ka	38	12	26

## Sheet: sac3a
Gene ID	Event identifier	dPSI	p-value	description	comp_description	IPR_domain
AT1G07350	SE:1:2258602-2258750:2258845-2259003:-	0.18445	0.0044955	RNA-binding (RRM/RBD/RNP motifs) family protein	RNA-binding (RRM/RBD/RNP motifs) family protein; FUNCTIONS IN: RNA binding, nucleotide binding, nucleic acid binding; INVOLVED IN: RNA splicing; EXPRESSED IN: 26 plant structures; EXPRESSED DURING: 15 growth stages; CONTAINS InterPro DOMAIN/s: RNA recognition motif, RNP-1 (InterPro:IPR000504), Nucleotide-binding, alpha-beta plait (InterPro:IPR012677); BEST Arabidopsis thaliana protein match is: R…	Nucleotide-binding, alpha-beta plait | RNA recognition motif domain
AT1G15200	SE:1:5229051-5229128:5229231-5229346:-	0.287244	0	protein-protein interaction regulator family protein	protein-protein interaction regulator family protein; FUNCTIONS IN: molecular_function unknown; INVOLVED IN: biological_process unknown; LOCATED IN: cellular_component unknown; EXPRESSED IN: 22 plant structures; EXPRESSED DURING: 13 growth stages; CONTAINS InterPro DOMAIN/s: Pinin/SDK/memA protein (InterPro:IPR006786)	Pinin/SDK/MemA protein
AT1G27630	SE:1:9611876-9612009:9612429-9612590:+	0.228176	0.000999001	cyclin T 1;3	cyclin T 1;3 (CYCT1;3); CONTAINS InterPro DOMAIN/s: Cyclin-like (InterPro:IPR011028), Transcription regulator cyclin (InterPro:IPR015429), Cyclin-related (InterPro:IPR013763), Cyclin, N-terminal (InterPro:IPR006671), Cyclin (InterPro:IPR006670); BEST Arabidopsis thaliana protein match is: Cyclin family protein (TAIR:AT5G45190.1)	Cyclin C/H/T/L | Cyclin, N-terminal | Cyclin-like
AT1G27630	SE:1:9611876-9612067:9612429-9612590:+	0.158502	0.00649351
AT1G60270	SE:1:22223292-22223392:22223483-22223567:-	0.586121	0.003996	beta glucosidase 6	beta glucosidase 6 (BGLU6); FUNCTIONS IN: cation binding, hydrolase activity, hydrolyzing O-glycosyl compounds, catalytic activity; INVOLVED IN: carbohydrate metabolic process; LOCATED IN: endomembrane system; EXPRESSED IN: 16 plant structures; EXPRESSED DURING: 10 growth stages; CONTAINS InterPro DOMAIN/s: Glycoside hydrolase, family 1 (InterPro:IPR001360), Glycoside hydrolase, family 1, active …	Glycoside hydrolase, catalytic domain | Glycoside hydrolase, family 1 | Glycoside hydrolase, family 1, active site | Glycoside hydrolase, superfamily
AT1G69252	SE:1:26036623-26036798:26037276-26037400:+	0.158249	0.00749251	other RNA
AT1G75560	SE:1:28372120-28372563:28373050-28373192:-	0.277575	0	zinc knuckle (CCHC-type) family protein	zinc knuckle (CCHC-type) family protein; FUNCTIONS IN: zinc ion binding, nucleic acid binding; INVOLVED IN: biological_process unknown; LOCATED IN: chloroplast; EXPRESSED IN: 23 plant structures; EXPRESSED DURING: 15 growth stages; CONTAINS InterPro DOMAIN/s: Zinc finger, CCHC-type (InterPro:IPR001878), Zinc finger, CCHC retroviral-type (InterPro:IPR013084); BEST Arabidopsis thaliana protein matc…	Zinc finger, CCHC-type | Zinc knuckle CX2CX4HX4C
AT1G78790	SE:1:29623500-29623670:29623760-29623929:-	-0.391431	0.001998		unknown protein; FUNCTIONS IN: molecular_function unknown; INVOLVED IN: biological_process unknown; LOCATED IN: cellular_component unknown; EXPRESSED IN: 23 plant structures; EXPRESSED DURING: 15 growth stages; CONTAINS InterPro DOMAIN/s: Protein of unknown function DUF2008 (InterPro:IPR018552)	Centromere protein X
AT1G79245	SE:1:29806938-29807030:29807128-29807243:-	0.147666	0.003996		expressed protein, Several heterogeneous transcript sequences map to this position
AT1G79245	SE:1:29806938-29807129:29807148-29807243:-	0.118082	0.00699301
AT2G30600	SE:2:13039013-13039259:13039283-13039382:+	-0.115195	0.00599401	BTB/POZ domain-containing protein	BTB/POZ domain-containing protein; INVOLVED IN: cell adhesion; LOCATED IN: cellular_component unknown; EXPRESSED IN: 24 plant structures; EXPRESSED DURING: 13 growth stages; CONTAINS InterPro DOMAIN/s: Coagulation factor 5/8 type, C-terminal (InterPro:IPR000421), Farnesoic acid 0-methyl transferase (InterPro:IPR022041), BTB/POZ (InterPro:IPR013069), BTB/Kelch-associated (InterPro:IPR011705), BTB/…	BTB/Kelch-associated | BTB/POZ | BTB/POZ fold | BTB/POZ-like | Coagulation factor 5/8 C-terminal type domain | Farnesoic acid O-methyl transferase | Galactose-binding domain-like
AT2G31370	SE:2:13379035-13379222:13379300-13379418:+	0.203992	0.002997	Basic-leucine zipper (bZIP) transcription factor family protein	Basic-leucine zipper (bZIP) transcription factor family protein; CONTAINS InterPro DOMAIN/s: Basic-leucine zipper (bZIP) transcription factor (InterPro:IPR004827), bZIP transcription factor, bZIP-1 (InterPro:IPR011616); BEST Arabidopsis thaliana protein match is: Basic-leucine zipper (bZIP) transcription factor family protein (TAIR:AT1G06070.1)	Basic-leucine zipper domain
AT2G39950	SE:2:16679015-16679173:16679228-16679378:-	0.457189	0.00549451		unknown protein; FUNCTIONS IN: molecular_function unknown; INVOLVED IN: biological_process unknown; LOCATED IN: cellular_component unknown; EXPRESSED IN: 24 plant structures; EXPRESSED DURING: 15 growth stages
AT2G45380	SE:2:18700897-18701098:18701285-18701537:-	0.166156	0.00549451		FUNCTIONS IN: molecular_function unknown; INVOLVED IN: biological_process unknown; LOCATED IN: cellular_component unknown; EXPRESSED IN: inflorescence meristem, flower, cultured cell; EXPRESSED DURING: petal differentiation and expansion stage; BEST Arabidopsis thaliana protein match is: Calcium-binding EF-hand family protein (TAIR:AT4G34070.1); BEST Arabidopsis thaliana protein match is: glycine…
AT2G45380	SE:2:18700897-18701098:18701377-18701537:-	0.122592	0.00649351
AT3G48070	SE:3:17752307-17752542:17752578-17752721:+	0.234512	0.0014985	RING/U-box superfamily protein	RING/U-box superfamily protein; FUNCTIONS IN: zinc ion binding; LOCATED IN: chloroplast; EXPRESSED IN: 24 plant structures; EXPRESSED DURING: 15 growth stages; CONTAINS InterPro DOMAIN/s: Zinc finger, RING-type (InterPro:IPR001841); BEST Arabidopsis thaliana protein match is: RING/U-box superfamily protein (TAIR:AT5G62910.1)	Zinc finger, RING-type | Zinc finger, RING/FYVE/PHD-type
AT3G49500	SE:3:18350068-18350491:18353210-18353467:-	-0.221071	0.00849151	RNA-dependent RNA polymerase 6	RNA-dependent RNA polymerase 6 (RDR6); CONTAINS InterPro DOMAIN/s: RNA-dependent RNA polymerase, eukaryotic-type (InterPro:IPR007855); BEST Arabidopsis thaliana protein match is: RNA-dependent RNA polymerase 1 (TAIR:AT1G14790.1)	RNA-dependent RNA polymerase, eukaryotic-type
AT4G16860	SE:4:9490811-9490995:9492072-9495231:-	-0.110101	0.0034965	Disease resistance protein (TIR-NBS-LRR class) family	recognition of peronospora parasitica 4 (RPP4); FUNCTIONS IN: LRR domain binding; INVOLVED IN: defense response to fungus, incompatible interaction, defense response; LOCATED IN: intrinsic to membrane; EXPRESSED IN: 22 plant structures; EXPRESSED DURING: 15 growth stages; CONTAINS InterPro DOMAIN/s: NB-ARC (InterPro:IPR002182), Leucine-rich repeat (InterPro:IPR001611), Disease resistance protein …	AAA+ ATPase domain | Leucine-rich repeat | Leucine-rich repeat 3 | NB-ARC | P-loop containing nucleoside triphosphate hydrolase | Toll/interleukin-1 receptor homology (TIR) domain
AT4G18370	SE:4:10149734-10149820:10149877-10149968:+	-0.139483	0.00949051	DEGP protease 5	DEGP protease 5 (DEG5); FUNCTIONS IN: serine-type peptidase activity, catalytic activity, serine-type endopeptidase activity; INVOLVED IN: photosystem II repair, proteolysis; LOCATED IN: thylakoid, thylakoid lumen, chloroplast thylakoid lumen, chloroplast; EXPRESSED IN: 22 plant structures; EXPRESSED DURING: 13 growth stages; CONTAINS InterPro DOMAIN/s: Serine/cysteine peptidase, trypsin-like (In…	Peptidase S1C | Trypsin-like cysteine/serine peptidase domain
AT4G28760	SE:4:14207760-14208170:14208243-14208632:+	0.136329	0.00949051	Protein of unknown function (DUF3741)	Protein of unknown function (DUF3741); CONTAINS InterPro DOMAIN/s: Protein of unknown function DUF3741 (InterPro:IPR022212); BEST Arabidopsis thaliana protein match is: Protein of unknown function (DUF3741) (TAIR:AT2G20240.1)	Domain of unknown function DUF4378 | Protein of unknown function DUF3741
AT4G38510	SE:4:18014796-18014960:18014975-18015066:-	-0.100012	0.00699301	ATPase, V1 complex, subunit B protein	ATPase, V1 complex, subunit B protein; FUNCTIONS IN: hydrogen ion transporting ATP synthase activity, rotational mechanism, hydrolase activity, acting on acid anhydrides, catalyzing transmembrane movement of substances, ATP binding, proton-transporting ATPase activity, rotational mechanism; FUNCTIONS IN: hydrogen ion transporting ATP synthase activity, rotational mechanism, hydrolase activity, ac…	ATPase, F1 complex alpha/beta subunit, N-terminal domain | ATPase, F1/V1/A1 complex, alpha/beta subunit, C-terminal | ATPase, F1/V1/A1 complex, alpha/beta subunit, nucleotide-binding domain | ATPase, V1 complex, subunit B | ATPase, alpha/beta subunit, nucleotide-binding domain, active site | P-loop containing nucleoside triphosphate hydrolase | V-type ATP synthase regulatory subunit B/beta
AT5G08185	SE:5:2634872-2634974:2635041-2635134:-	-0.217664	0.001998	microRNA162A	microRNA162A (MIR162A); FUNCTIONS IN: molecular_function unknown; INVOLVED IN: RNA interference; LOCATED IN: endomembrane system; EXPRESSED IN: stem, root, inflorescence, cultured cell, leaf
AT5G08185	SE:5:2634875-2634974:2635041-2635134:-	-0.217664	0.001998
AT5G10350	SE:5:3256213-3256503:3256927-3257230:-	0.132992	0.0044955	RNA-binding (RRM/RBD/RNP motifs) family protein	RNA-binding (RRM/RBD/RNP motifs) family protein; CONTAINS InterPro DOMAIN/s: RNA recognition motif, RNP-1 (InterPro:IPR000504), Nucleotide-binding, alpha-beta plait (InterPro:IPR012677); FUNCTIONS IN: protein binding, RNA binding, poly(A) RNA binding; BEST Arabidopsis thaliana protein match is: RNA-binding (RRM/RBD/RNP motifs) family protein (TAIR:AT5G65260.1); INVOLVED IN: biological_process unk…	Nucleotide-binding, alpha-beta plait | RNA recognition motif domain
AT5G13560	SE:5:4364946-4365089:4365141-4365289:-	0.164272	0.0044955		unknown protein; BEST Arabidopsis thaliana protein match is: unknown protein (TAIR:AT2G37370.1)
AT5G65685	SE:5:26275236-26275329:26275407-26275481:-	-0.126072	0.00599401	UDP-Glycosyltransferase superfamily protein	UDP-Glycosyltransferase superfamily protein; FUNCTIONS IN: starch synthase activity; EXPRESSED IN: 24 plant structures; LOCATED IN: chloroplast; EXPRESSED DURING: 15 growth stages; CONTAINS InterPro DOMAIN/s: Starch synthase, catalytic domain (InterPro:IPR013534); BEST Arabidopsis thaliana protein match is: starch synthase 4 (TAIR:AT4G18240.1)

## Sheet: prp4ka
Gene ID	Event identifier	dPSI	p-value	Description	comp_description	IPR_domain
AT1G08110	SE:1:2535385-2535570:2535585-2535675:+	-0.140779	0	lactoylglutathione lyase family protein / glyoxalase I family protein	lactoylglutathione lyase family protein / glyoxalase I family protein; FUNCTIONS IN: calmodulin binding, lactoylglutathione lyase activity; INVOLVED IN: response to cadmium ion, carbohydrate metabolic process; LOCATED IN: chloroplast; EXPRESSED IN: 25 plant structures; EXPRESSED DURING: 14 growth stages; CONTAINS InterPro DOMAIN/s: Glyoxalase I (InterPro:IPR004361), Glyoxalase I, conserved site (…	Glyoxalase I | Glyoxalase I, conserved site | Glyoxalase/Bleomycin resistance protein/Dihydroxybiphenyl dioxygenase | Glyoxalase/fosfomycin resistance/dioxygenase domain
AT1G13350	SE:1:4575835-4575962:4576047-4576239:-	-0.45206	0.000499501	Protein kinase superfamily protein	Protein kinase superfamily protein; FUNCTIONS IN: protein serine/threonine kinase activity, protein kinase activity, ATP binding; INVOLVED IN: protein amino acid phosphorylation; LOCATED IN: nucleus, cytoplasm; EXPRESSED IN: male gametophyte, cultured cell, pollen tube; EXPRESSED IN: male gametophyte, pollen tube; EXPRESSED DURING: L mature pollen stage, M germinated pollen stage; CONTAINS InterP…	Protein kinase domain | Protein kinase-like domain | Serine/threonine-protein kinase, active site | Serine/threonine/dual specificity protein kinase, catalytic domain
AT1G36070	SE:1:13468699-13469098:13469138-13469914:-	-0.232642	0.0034965	Transducin/WD40 repeat-like superfamily protein	Transducin/WD40 repeat-like superfamily protein; FUNCTIONS IN: molecular_function unknown; INVOLVED IN: biological_process unknown; LOCATED IN: CUL4 RING ubiquitin ligase complex, heterotrimeric G-protein complex; EXPRESSED IN: 22 plant structures; EXPRESSED DURING: 13 growth stages; CONTAINS InterPro DOMAIN/s: WD40 repeat 2 (InterPro:IPR019782), WD40 repeat-like-containing domain (InterPro:IPR01…	WD40 repeat | WD40 repeat, conserved site | WD40-repeat-containing domain | WD40/YVTN repeat-like-containing domain
AT1G43130	SE:1:16229623-16229977:16230086-16230175:-	-0.129522	0.0044955	like COV 2	like COV 2 (LCV2); CONTAINS InterPro DOMAIN/s: Protein of unknown function DUF502 (InterPro:IPR007462); BEST Arabidopsis thaliana protein match is: Protein of unknown function (DUF502) (TAIR:AT2G20120.1)	Protein of unknown function DUF502
AT1G49590	SE:1:18355489-18355747:18355796-18355880:+	-0.177287	0.0044955	C2H2 and C2HC zinc fingers superfamily protein	C2H2 and C2HC zinc fingers superfamily protein; FUNCTIONS IN: zinc ion binding, nucleic acid binding; INVOLVED IN: biological_process unknown; LOCATED IN: nucleus; EXPRESSED IN: 23 plant structures; EXPRESSED DURING: 13 growth stages; CONTAINS InterPro DOMAIN/s: Zinc finger, U1-C type (InterPro:IPR013085), Zinc finger, C2H2-type matrin (InterPro:IPR000690); CONTAINS InterPro DOMAIN/s: Zinc finger…	Zinc finger, C2H2-type matrin | Zinc finger, U1-C type
AT1G60690	SE:1:22350679-22350782:22350836-22351085:-	0.269235	0.001998	NAD(P)-linked oxidoreductase superfamily protein	NAD(P)-linked oxidoreductase superfamily protein; FUNCTIONS IN: oxidoreductase activity, aldo-keto reductase activity; INVOLVED IN: oxidation reduction; LOCATED IN: plasma membrane, chloroplast envelope; EXPRESSED IN: 22 plant structures; EXPRESSED DURING: 13 growth stages; CONTAINS InterPro DOMAIN/s: Aldo/keto reductase (InterPro:IPR001395); BEST Arabidopsis thaliana protein match is: NAD(P)-lin…	Aldo/keto reductase | NADP-dependent oxidoreductase domain
AT1G60900	SE:1:22425403-22425574:22425674-22425927:+	-0.286558	0.0044955	U2 snRNP auxilliary factor, large subunit, splicing factor	U2 snRNP auxilliary factor, large subunit, splicing factor; FUNCTIONS IN: RNA binding, nucleotide binding, nucleic acid binding; INVOLVED IN: mRNA processing; LOCATED IN: nucleus; CONTAINS InterPro DOMAIN/s: RNA recognition motif, RNP-1 (InterPro:IPR000504), Nucleotide-binding, alpha-beta plait (InterPro:IPR012677), U2 snRNP auxilliary factor, large subunit, splicing factor (InterPro:IPR006529); …	Nucleotide-binding, alpha-beta plait | RNA recognition motif domain | U2 snRNP auxilliary factor, large subunit, splicing factor
AT1G61010	SE:1:22474547-22474630:22474669-22474930:-	-0.258271	0	cleavage and polyadenylation specificity factor 73-I	cleavage and polyadenylation specificity factor 73-I (CPSF73-I); CONTAINS InterPro DOMAIN/s: Beta-Casp domain (InterPro:IPR022712), RNA-metabolising metallo-beta-lactamase (InterPro:IPR011108), Beta-lactamase-like (InterPro:IPR001279), Pre-mRNA 3&apos;-end-processing endonuclease polyadenylation factor C-term (InterPro:IPR021718); BEST Arabidopsis thaliana protein match is: cleavage and polyadeny…	Beta-Casp domain | Beta-lactamase-like | Pre-mRNA 3'-end-processing endonuclease polyadenylation factor C-term | RNA-metabolising metallo-beta-lactamase
AT1G61150	SE:1:22542673-22542958:22542981-22543107:+	-0.197561	0.00549451	LisH and RanBPM domains containing protein	LisH and RanBPM domains containing protein; FUNCTIONS IN: molecular_function unknown; INVOLVED IN: biological_process unknown; LOCATED IN: cellular_component unknown; EXPRESSED IN: 23 plant structures; EXPRESSED DURING: 13 growth stages; CONTAINS InterPro DOMAIN/s: LisH dimerisation motif, subgroup (InterPro:IPR013720), Ran binding protein, CRA domain (InterPro:IPR019589), CTLH, C-terminal LisH m…	CRA domain | CTLH, C-terminal LisH motif | CTLH/CRA C-terminal to LisH motif domain | LisH dimerisation motif | LisH dimerisation motif, subgroup
AT1G64790	SE:1:24076310-24076477:24076593-24076673:-	0.321547	0	ILITYHIA	ILITYHIA (ILA); FUNCTIONS IN: binding; INVOLVED IN: systemic acquired resistance, defense response to bacterium; LOCATED IN: cytosol, nucleus; LOCATED IN: cytosol, nucleus, membrane; EXPRESSED IN: 23 plant structures; EXPRESSED IN: 24 plant structures; EXPRESSED DURING: 13 growth stages; CONTAINS InterPro DOMAIN/s: HEAT (InterPro:IPR000357), Armadillo-like helical (InterPro:IPR011989), HEAT, type…	Armadillo-like helical | Armadillo-type fold | Domain of unknown function DUF3554 | HEAT, type 2 | Proteasome component ECM29/Translational activator GCN1
AT1G69252	SE:1:26036623-26036798:26037276-26037400:+	-0.503393	0	other RNA
AT1G78070	SE:1:29355825-29356665:29356708-29357085:+	-0.103793	0.00599401	Transducin/WD40 repeat-like superfamily protein	Transducin/WD40 repeat-like superfamily protein; CONTAINS InterPro DOMAIN/s: WD40 repeat 2 (InterPro:IPR019782), WD40 repeat-like-containing domain (InterPro:IPR011046), WD40 repeat, conserved site (InterPro:IPR019775), WD40-repeat-containing domain (InterPro:IPR017986), WD40/YVTN repeat-like-containing domain (InterPro:IPR015943), WD40 repeat (InterPro:IPR001680), WD40 repeat, subgroup (InterPro…	WD40 repeat | WD40 repeat, conserved site | WD40-repeat-containing domain | WD40/YVTN repeat-like-containing domain
AT1G78790	SE:1:29623500-29623670:29623760-29623929:-	-0.434149	0.003996		unknown protein; FUNCTIONS IN: molecular_function unknown; INVOLVED IN: biological_process unknown; LOCATED IN: cellular_component unknown; EXPRESSED IN: 23 plant structures; EXPRESSED DURING: 15 growth stages; CONTAINS InterPro DOMAIN/s: Protein of unknown function DUF2008 (InterPro:IPR018552)	Centromere protein X
AT2G01450	SE:2:202025-202227:202272-203031:-	0.100276	0.00749251	MAP kinase 17	MAP kinase 17 (MPK17); CONTAINS InterPro DOMAIN/s: MAP kinase, conserved site (InterPro:IPR003527), Protein kinase, ATP binding site (InterPro:IPR017441), Protein kinase, catalytic domain (InterPro:IPR000719), Serine/threonine-protein kinase domain (InterPro:IPR002290), Tyrosine-protein kinase, catalytic domain (InterPro:IPR020635), Serine/threonine-protein kinase-like domain (InterPro:IPR017442)…	Mitogen-activated protein (MAP) kinase, conserved site | Protein kinase domain | Protein kinase, ATP binding site | Protein kinase-like domain | Serine/threonine/dual specificity protein kinase, catalytic domain
AT2G18440	SE:2:7995217-7995892:7995974-7996357:-	-0.207439	0.00549451	GUT15 (GENE WITH UNSTABLE TRANSCRIPT 15); other RNA
AT2G27340	SE:2:11696799-11696937:11697163-11697449:+	-0.400416	0.000499501	N-acetylglucosaminylphosphatidylinositol de-N-acetylase family protein	N-acetylglucosaminylphosphatidylinositol de-N-acetylase family protein; FUNCTIONS IN: molecular_function unknown; INVOLVED IN: biological_process unknown; LOCATED IN: endomembrane system; CONTAINS InterPro DOMAIN/s: N-acetylglucosaminyl phosphatidylinositol deacetylase (InterPro:IPR003737); BEST Arabidopsis thaliana protein match is: N-acetylglucosaminylphosphatidylinositol de-N-acetylase family …	N-acetylglucosaminyl phosphatidylinositol deacetylase-related | Putative deacetylase LmbE-like domain
AT2G31810	SE:2:13527554-13527798:13527863-13528157:+	-0.106851	0.003996	ACT domain-containing small subunit of acetolactate synthase protein	ACT domain-containing small subunit of acetolactate synthase protein; FUNCTIONS IN: acetolactate synthase activity, amino acid binding; INVOLVED IN: branched chain family amino acid biosynthetic process; LOCATED IN: chloroplast; EXPRESSED IN: 24 plant structures; EXPRESSED DURING: 13 growth stages; CONTAINS InterPro DOMAIN/s: Acetolactate synthase, small subunit (InterPro:IPR004789), Amino acid-b…	ACT domain | Acetolactate synthase, small subunit | Acetolactate synthase, small subunit, C-terminal
AT2G45540	SE:2:18772281-18772422:18772459-18772632:-	0.255017	0.0014985	WD-40 repeat family protein / beige-related	WD-40 repeat family protein / beige-related; FUNCTIONS IN: nucleotide binding; INVOLVED IN: biological_process unknown; LOCATED IN: cellular_component unknown; EXPRESSED IN: 24 plant structures; EXPRESSED IN: 25 plant structures; EXPRESSED DURING: 14 growth stages; CONTAINS InterPro DOMAIN/s: WD40 repeat 2 (InterPro:IPR019782), WD40 repeat-like-containing domain (InterPro:IPR011046), Beige/BEACH …	BEACH domain | Concanavalin A-like lectin/glucanases superfamily | PH-BEACH domain | WD40 repeat | WD40-repeat-containing domain | WD40/YVTN repeat-like-containing domain
AT3G01150	SE:3:52364-52645:52746-52889:+	0.103036	0.00849151	polypyrimidine tract-binding protein 1	POLYPYRIMIDINE TRACT-BINDING (PTB); polypyrimidine tract-binding protein 1 (PTB1); FUNCTIONS IN: RNA binding, nucleotide binding, nucleic acid binding; INVOLVED IN: pollen germination, regulation of RNA splicing, regulation of translation; LOCATED IN: nucleus, cytoplasmic mRNA processing body, cytoplasm; EXPRESSED IN: 28 plant structures; EXPRESSED DURING: 14 growth stages; CONTAINS InterPro DOMA…	Nucleotide-binding, alpha-beta plait | RNA recognition motif domain
AT3G02600	SE:3:551584-552437:552529-552931:+	-0.144296	0.00499501	lipid phosphate phosphatase 3	lipid phosphate phosphatase 3 (LPP3); FUNCTIONS IN: phosphatidate phosphatase activity; INVOLVED IN: phospholipid metabolic process; LOCATED IN: plasma membrane, integral to plasma membrane; EXPRESSED IN: 24 plant structures; EXPRESSED DURING: 14 growth stages; CONTAINS InterPro DOMAIN/s: Phosphatidic acid phosphatase/chloroperoxidase, N-terminal (InterPro:IPR016118), Phosphatidic acid phosphatas…	Lipid phosphate phosphatase, plant | Phosphatidic acid phosphatase type 2/haloperoxidase
AT3G16840	SE:3:5740846-5740929:5740991-5741099:-	0.145085	0.0034965	P-loop containing nucleoside triphosphate hydrolases superfamily protein	P-loop containing nucleoside triphosphate hydrolases superfamily protein; FUNCTIONS IN: helicase activity, nucleic acid binding, ATP binding, ATP-dependent helicase activity; INVOLVED IN: biological_process unknown; LOCATED IN: cellular_component unknown; EXPRESSED IN: 22 plant structures; EXPRESSED DURING: 13 growth stages; CONTAINS InterPro DOMAIN/s: DNA/RNA helicase, DEAD/DEAH box type, N-term…	DEAD/DEAH box helicase domain | Helicase, C-terminal | Helicase, superfamily 1/2, ATP-binding domain | P-loop containing nucleoside triphosphate hydrolase | RNA helicase, ATP-dependent, DEAD-box, conserved site | RNA helicase, DEAD-box type, Q motif
AT3G17310	SE:3:5911519-5911849:5911904-5912020:-	0.155691	0.00749251	S-adenosyl-L-methionine-dependent methyltransferases superfamily protein	S-adenosyl-L-methionine-dependent methyltransferases superfamily protein; BEST Arabidopsis thaliana protein match is: domains rearranged methyltransferase 2 (TAIR:AT5G14620.1)	S-adenosyl-L-methionine-dependent methyltransferase-like
AT3G49430	SE:3:18331712-18332248:18332471-18332642:+	-0.107055	0.00649351	SER/ARG-rich protein 34A	SER/ARG-rich protein 34A (SRp34a); FUNCTIONS IN: RNA binding, nucleotide binding, nucleic acid binding; INVOLVED IN: RNA splicing; EXPRESSED IN: 24 plant structures; LOCATED IN: nucleolus; EXPRESSED DURING: 13 growth stages; CONTAINS InterPro DOMAIN/s: RNA recognition motif, RNP-1 (InterPro:IPR000504), Nucleotide-binding, alpha-beta plait (InterPro:IPR012677); BEST Arabidopsis thaliana protein ma…	Nucleotide-binding, alpha-beta plait | RNA recognition motif domain
AT3G49645	SE:3:18404269-18404366:18404443-18404703:-	-0.196304	0.00499501		unknown protein; FUNCTIONS IN: molecular_function unknown; INVOLVED IN: biological_process unknown; LOCATED IN: cellular_component unknown
AT3G54840	SE:3:20318621-20318856:20318935-20319374:+	-0.235782	0	Ras-related small GTP-binding family protein	ARA6; CONTAINS InterPro DOMAIN/s: Ras GTPase (InterPro:IPR001806), Small GTP-binding protein (InterPro:IPR005225), Small GTPase (InterPro:IPR020851), Ras (InterPro:IPR013753), Ras small GTPase, Rab type (InterPro:IPR003579), Rab5-related (InterPro:IPR015599); FUNCTIONS IN: GTP binding, GTPase activity; BEST Arabidopsis thaliana protein match is: Ras-related small GTP-binding family protein (TAIR:…	P-loop containing nucleoside triphosphate hydrolase | Small GTP-binding protein domain | Small GTPase superfamily | Small GTPase superfamily, Rab type
AT4G16860	SE:4:9490811-9490995:9492072-9495231:-	-0.226832	0.0024975	Disease resistance protein (TIR-NBS-LRR class) family	recognition of peronospora parasitica 4 (RPP4); FUNCTIONS IN: LRR domain binding; INVOLVED IN: defense response to fungus, incompatible interaction, defense response; LOCATED IN: intrinsic to membrane; EXPRESSED IN: 22 plant structures; EXPRESSED DURING: 15 growth stages; CONTAINS InterPro DOMAIN/s: NB-ARC (InterPro:IPR002182), Leucine-rich repeat (InterPro:IPR001611), Disease resistance protein …	AAA+ ATPase domain | Leucine-rich repeat | Leucine-rich repeat 3 | NB-ARC | P-loop containing nucleoside triphosphate hydrolase | Toll/interleukin-1 receptor homology (TIR) domain
AT4G25030	SE:4:12864570-12864706:12864770-12865307:+	-0.477592	0.000499501		unknown protein; BEST Arabidopsis thaliana protein match is: unknown protein (TAIR:AT5G45410.3)
AT4G25170	SE:4:12910149-12910413:12910457-12910597:+	0.219415	0	Uncharacterised conserved protein (UCP012943)	Uncharacterised conserved protein (UCP012943); FUNCTIONS IN: molecular_function unknown; INVOLVED IN: biological_process unknown; EXPRESSED IN: 23 plant structures; EXPRESSED DURING: 13 growth stages; CONTAINS InterPro DOMAIN/s: Uncharacterised conserved protein UCP012943 (InterPro:IPR016606); BEST Arabidopsis thaliana protein match is: Uncharacterised conserved protein (UCP012943) (TAIR:AT5G6149…	Uncharacterised conserved protein UCP012943
AT4G38510	SE:4:18014796-18014903:18014975-18015066:-	-0.31673	0.000999001	ATPase, V1 complex, subunit B protein	ATPase, V1 complex, subunit B protein; FUNCTIONS IN: hydrogen ion transporting ATP synthase activity, rotational mechanism, hydrolase activity, acting on acid anhydrides, catalyzing transmembrane movement of substances, ATP binding, proton-transporting ATPase activity, rotational mechanism; FUNCTIONS IN: hydrogen ion transporting ATP synthase activity, rotational mechanism, hydrolase activity, ac…	ATPase, F1 complex alpha/beta subunit, N-terminal domain | ATPase, F1/V1/A1 complex, alpha/beta subunit, C-terminal | ATPase, F1/V1/A1 complex, alpha/beta subunit, nucleotide-binding domain | ATPase, V1 complex, subunit B | ATPase, alpha/beta subunit, nucleotide-binding domain, active site | P-loop containing nucleoside triphosphate hydrolase | V-type ATP synthase regulatory subunit B/beta
AT4G38510	SE:4:18014796-18014960:18014975-18015066:-	0.1225	0.00499501
AT5G05550	SE:5:1639357-1639454:1639551-1639824:-	-0.314757	0	sequence-specific DNA binding transcription factors	sequence-specific DNA binding transcription factors; BEST Arabidopsis thaliana protein match is: sequence-specific DNA binding transcription factors (TAIR:AT3G11100.1)
AT5G06120	SE:5:1844184-1844737:1844803-1845292:+	-0.189542	0.00799201	ARM repeat superfamily protein	ARM repeat superfamily protein; FUNCTIONS IN: protein transporter activity, binding; INVOLVED IN: intracellular protein transport, protein import into nucleus, docking; LOCATED IN: nucleus, nuclear pore, cytoplasm; EXPRESSED IN: 22 plant structures; EXPRESSED DURING: 13 growth stages; CONTAINS InterPro DOMAIN/s: Importin-beta, N-terminal (InterPro:IPR001494), Armadillo-type fold (InterPro:IPR0160…	Armadillo-like helical | Armadillo-type fold | Importin-beta, N-terminal domain
AT5G17230	SE:5:5662239-5662615:5662651-5662773:-	0.501755	0.0024975	PHYTOENE SYNTHASE	PHYTOENE SYNTHASE (PSY); CONTAINS InterPro DOMAIN/s: Squalene/phytoene synthase, conserved site (InterPro:IPR019845), Terpenoid synthase (InterPro:IPR008949), Squalene/phytoene synthase (InterPro:IPR002060); FUNCTIONS IN: phytoene synthase activity, geranylgeranyl-diphosphate geranylgeranyltransferase activity; INVOLVED IN: carotenoid biosynthetic process; LOCATED IN: chloroplast; EXPRESSED IN: 2…	Squalene/phytoene synthase | Squalene/phytoene synthase, conserved site | Terpenoid synthase
AT5G22450	SE:5:7442900-7443097:7443184-7443294:-	-0.276671	0.0014985		unknown protein; LOCATED IN: chloroplast; EXPRESSED IN: 22 plant structures; EXPRESSED DURING: 13 growth stages; BEST Arabidopsis thaliana protein match is: unknown protein (TAIR:AT2G19390.1)
AT5G41690	SE:5:16674075-16674168:16674230-16674362:-	-0.309563	0.00549451	RNA-binding (RRM/RBD/RNP motifs) family protein	RNA-binding (RRM/RBD/RNP motifs) family protein; FUNCTIONS IN: RNA binding, nucleotide binding, nucleic acid binding; CONTAINS InterPro DOMAIN/s: RNA recognition motif, RNP-1 (InterPro:IPR000504), Nucleotide-binding, alpha-beta plait (InterPro:IPR012677); BEST Arabidopsis thaliana protein match is: RNA-binding (RRM/RBD/RNP motifs) family protein (TAIR:AT1G45100.1)	Nucleotide-binding, alpha-beta plait | RNA recognition motif domain
AT5G42250	SE:5:16894380-16895213:16895251-16895885:+	0.356372	0.0014985	Zinc-binding alcohol dehydrogenase family protein	Zinc-binding alcohol dehydrogenase family protein; FUNCTIONS IN: oxidoreductase activity, zinc ion binding; INVOLVED IN: oxidation reduction; EXPRESSED IN: 11 plant structures; EXPRESSED DURING: 6 growth stages; CONTAINS InterPro DOMAIN/s: GroES-like (InterPro:IPR011032), Alcohol dehydrogenase GroES-like (InterPro:IPR013154), Alcohol dehydrogenase, zinc-containing, conserved site (InterPro:IPR002…	Alcohol dehydrogenase GroES-like | Alcohol dehydrogenase superfamily, zinc-type | Alcohol dehydrogenase, C-terminal | Alcohol dehydrogenase, zinc-type, conserved site | GroES (chaperonin 10)-like | NAD(P)-binding domain
AT5G48220	SE:5:19550055-19550132:19550226-19550376:+	0.239943	0	Aldolase-type TIM barrel family protein	Aldolase-type TIM barrel family protein; FUNCTIONS IN: indole-3-glycerol-phosphate synthase activity, catalytic activity; INVOLVED IN: metabolic process, tryptophan metabolic process; EXPRESSED IN: 22 plant structures; LOCATED IN: chloroplast; LOCATED IN: chloroplast, chloroplast stroma; EXPRESSED DURING: 13 growth stages; CONTAINS InterPro DOMAIN/s: Aldolase-type TIM barrel (InterPro:IPR013785),…	Aldolase-type TIM barrel | Indole-3-glycerol phosphate synthase | Indole-3-glycerol phosphate synthase, conserved site | Ribulose-phosphate binding barrel
AT5G48880	SE:5:19816805-19816923:19817121-19817773:-	-0.160971	0.003996	peroxisomal 3-keto-acyl-CoA thiolase 2	PEROXISOMAL-3-KETO-ACYL-COA THIOLASE 1 (PKT1); peroxisomal 3-keto-acyl-CoA thiolase 2; peroxisomal 3-keto-acyl-CoA thiolase 2 (PKT2); FUNCTIONS IN: transferase activity, transferring acyl groups other than amino-acyl groups, catalytic activity, acetyl-CoA C-acyltransferase activity; INVOLVED IN: fatty acid oxidation; LOCATED IN: peroxisome; EXPRESSED IN: 22 plant structures; EXPRESSED DURING: 14 …	Thiolase | Thiolase, C-terminal | Thiolase, N-terminal | Thiolase, active site | Thiolase, acyl-enzyme intermediate active site | Thiolase, conserved site | Thiolase-like | Thiolase-like, subgroup

## Sheet: Overlap
		sac3a		prp4ka
Gene ID	Event identifier	dPSI	p-value	dPSI	p-value	description	comp_description	IPR_domain
AT1G69252	SE:1:26036623-26036798:26037276-26037400:+	0.158249	0.00749251	-0.503393	0	other RNA
AT1G78790	SE:1:29623500-29623670:29623760-29623929:-	-0.391431	0.001998	-0.434149	0.003996		unknown protein; FUNCTIONS IN: molecular_function unknown; INVOLVED IN: biological_process unknown; LOCATED IN: cellular_component unknown; EXPRESSED IN: 23 plant structures; EXPRESSED DURING: 15 growth stages; CONTAINS InterPro DOMAIN/s: Protein of unknown function DUF2008 (InterPro:IPR018552)	Centromere protein X
AT4G16860	SE:4:9490811-9490995:9492072-9495231:-	-0.110101	0.0034965	-0.226832	0.0024975	Disease resistance protein (TIR-NBS-LRR class) family	recognition of peronospora parasitica 4 (RPP4); FUNCTIONS IN: LRR domain binding; INVOLVED IN: defense response to fungus, incompatible interaction, defense response; LOCATED IN: intrinsic to membrane; EXPRESSED IN: 22 plant structures; EXPRESSED DURING: 15 growth stages; CONTAINS InterPro DOMAIN/s: NB-ARC (InterPro:IPR002182), Leucine-rich repeat (InterPro:IPR001611), Disease resistance protein …	AAA+ ATPase domain | Leucine-rich repeat | Leucine-rich repeat 3 | NB-ARC | P-loop containing nucleoside triphosphate hydrolase | Toll/interleukin-1 receptor homology (TIR) domain
AT4G38510	SE:4:18014796-18014960:18014975-18015066:-	-0.100012	0.00699301	0.1225	0.00499501	ATPase, V1 complex, subunit B protein	ATPase, V1 complex, subunit B protein; FUNCTIONS IN: hydrogen ion transporting ATP synthase activity, rotational mechanism, hydrolase activity, acting on acid anhydrides, catalyzing transmembrane movement of substances, ATP binding, proton-transporting ATPase activity, rotational mechanism; FUNCTIONS IN: hydrogen ion transporting ATP synthase activity, rotational mechanism, hydrolase activity, ac…	ATPase, F1 complex alpha/beta subunit, N-terminal domain | ATPase, F1/V1/A1 complex, alpha/beta subunit, C-terminal | ATPase, F1/V1/A1 complex, alpha/beta subunit, nucleotide-binding domain | ATPase, V1 complex, subunit B | ATPase, alpha/beta subunit, nucleotide-binding domain, active site | P-loop containing nucleoside triphosphate hydrolase | V-type ATP synthase regulatory subunit B/beta
